# Supplementary material for: The Parasitic Plant Cuscuta australis Is Highly Insensitive to Abscisic Acid-Induced Suppression of Hypocotyl Elongation and Seed Germination
Source: PubMed Central journal article supplement (PMC4530876; doi:10.1371/journal.pone.0135197), 2015-08-10
Supplement: pone.0135197.s001.pdf [file pone.0135197.s001.pdf]

**S1 Table Nomenclature and corresponding accession numbers (from NCBI) for the PYR/PYL/RCAR family of ABA receptors of *Cuscuta australis*, *Oryza sativa*, *Arabidopsis thaliana*, and *Solanum lycopersicum***

| <i>Cuscuta australis</i> |           | <i>Oryza sativa</i> |                | <i>Arabidopsis thaliana</i> |             | <i>Solanum lycopersicum</i> |                |
|--------------------------|-----------|---------------------|----------------|-----------------------------|-------------|-----------------------------|----------------|
| Nomenclature             | Accession | Nomenclature        | Accession      | Nomenclature                | Accession   | Nomenclature                | Accession      |
| CaPYL1                   | KR232648  | OsPYL1              | NP_001065470.1 | PYR1                        | NP_193521.1 | SIPYL1                      | Solyc06g061180 |
| CaPYL2                   | KR232649  | OsPYL2              | NP_001057874.1 | PYL1                        | NP_199491.2 | SIPYL2                      | Solyc08g076960 |
| CaPYL3                   | KR232650  | OsPYL3              | NP_001172865.1 | PYL2                        | NP_180174.1 | SIPYL3                      | Solyc12g095970 |
| CaPYL4                   | KR232651  | OsPYL4              | BAB68102       | PYL3                        | NP_177443.1 | SIPYL4                      | Solyc08g065410 |
|                          |           | OsPYL5              | AIX10777.1     | PYL4                        | NP_565887.1 | SIPYL5                      | Solyc03g095780 |
|                          |           | OsPYL6              | NP_001049838.1 | PYL5                        | NP_196163.1 | SIPYL6                      | Solyc06g050500 |
|                          |           | OsPYL7              | EEE65809       | PYL6                        | NP_565928.1 | SIPYL7                      | Solyc05g052420 |
|                          |           | OsPYL8              | NP_001057771.1 | PYL7                        | NP_567208.1 | SIPYL8                      | Solyc10g085310 |
|                          |           | OsPYL9              | NP_001057772.1 | PYL8                        | NP_200128.1 | SIPYL9                      | Solyc09g015380 |
|                          |           | OsPYL10             | NP_001046464.1 | PYL9                        | NP_563626.1 | SIPYL10                     | Solyc10g076410 |
|                          |           | OsPYL11             | NP_001054923.1 | PYL10                       | NP_194521.2 | SIPYL11                     | Solyc01g095700 |
|                          |           | OsPYL12             | BAD29692.1     | PYL11                       | NP_199398.1 | SIPYL12                     | Solyc03g007310 |
|                          |           |                     |                | PYL12                       | NP_199399.1 | SIPYL13                     | Solyc08g082180 |
|                          |           |                     |                | PYL13                       | NP_193597.1 | SIPYL14                     | Solyc12g055990 |
|                          |           |                     |                |                             |             | SIPYL15                     | Solyc02g076770 |
